# Supplementary material for: meta-Position synergistic effect induced by Ni–Mo co-doped WSe2 to enhance the hydrogen evolution reaction
Source: Royal Society of Chemistry journal article supplement (doi:10.1039/d2dt01350a), 2022-01-01
Supplement: d2dt01350a1.pdf [file d2dt01350a1.pdf]

*Electronic Supplementary Information*

**Meta-position synergistic effect induced by Ni-Mo co-doping WSe<sub>2</sub> to enhance hydrogen evolution Reaction**

Xinya Zhao<sup>a,b</sup>, Kankan Liu<sup>\*a,b</sup>, Fengbo Guo<sup>\*a,b</sup>, Zeyang He<sup>c</sup>, Lixin Zhang<sup>\*b,d</sup>, Shiwen Lei<sup>e</sup>, Huadong Li<sup>a</sup>, Yongkang Cheng<sup>a</sup> and Lei Yang<sup>f</sup>

<sup>a</sup> School of Environment and Safety Engineering, North University of China, Taiyuan, 030051, China

<sup>b</sup> Shanxi Key Laboratory of High Performance Battery Materials and Devices, North University of China, Taiyuan, 030051, China

<sup>c</sup> Department of Environment and Geography, University of York, Heslington, York, YO10 5DD, United Kingdom

<sup>d</sup> School of Chemical Engineering and Technology, North University of China, Taiyuan, 030051, China

<sup>e</sup> Institute of coal chemistry, Chinese academy of sciences, Taiyuan, 030000, China

<sup>f</sup> Shenzhen HUASUAN Technology Co.,Ltd, 4168 Liuxian Ave, Nanshan District, Shenzhen, 518055, China

\*Corresponding authors.

E-mail addresses: [liukk@nuc.edu.cn](mailto:liukk@nuc.edu.cn) (K. Liu), [gfb@nuc.edu.cn](mailto:gfb@nuc.edu.cn) (F.B. Guo), [edwardzlx@163.com](mailto:edwardzlx@163.com) (L.X. Zhang)

## EXPERIMENTAL SECTION

### Calculation of the electrochemically active surface area

Capacitance values of the samples can be converted into an electrochemical active surface area (ECSA) using a specific capacitance of flat standard with 1cm<sup>2</sup> of real surface area. By taking the specific capacitance value ( $C_s$ ) for an ideally flat standard electrode into account,  $C_s=0.040$  mF cm<sup>-2</sup>, the ECSA can be determined<sup>1, 2</sup>:

$$ECSA = C_{dl}/C_s \quad (1)$$

### Calculation of the Turnover Frequency

TOF is calculated as

$$TOF = J * S / (X * F * n) \quad (2)$$

J: current (in A) during the linear sweep measurement.

S: the area of the working electrode.

X: The factor ½ arrives by taking into account that two electrons are required to form one hydrogen.

F: Faraday constant (~ 96485 C mol<sup>-1</sup>).

n: the number of active sites (mol).

### First-Principles Density Functional theory

The free energy of hydrogen adsorption ( $\Delta G_{H^*}$ ) is a useful descriptor to describe the activity in acid, ideal hydrogen reduction catalysts have  $\Delta G_{H^*} \approx 0$  eV<sup>3</sup>. Hydrogen atom adsorption energy ( $E_{ad}$ ) is calculated as follows:

$$E_{ad} = E_{M-WSe_2+H} - E_{M-WSe_2} - 0.5E_{H_2} \quad (3)$$

$E_{M-WSe_2+H}$ : the total energy of the catalyst that absorbs one H atom,

$E_{M-WSe_2}$ : the total energy of the catalyst without H atom, where M is Mo, Ni, NiMo,

$E_{H_2}$ : gas phase hydrogen molecular energy.

$\Delta G_{H^*}$  is calculated as follows:

$$\Delta G_{H^*} = E_{ad} + \Delta E_{ZPE} - \Delta TS_H \quad (4)$$

$\Delta E_{ZPE}$ : the zero-point energy between the adsorbed hydrogen atom and its reference state in the  $H_2$  molecule.

$\Delta TS_H$ : the entropy between the adsorbed H and  $H_2$  molecules in the gas phase.

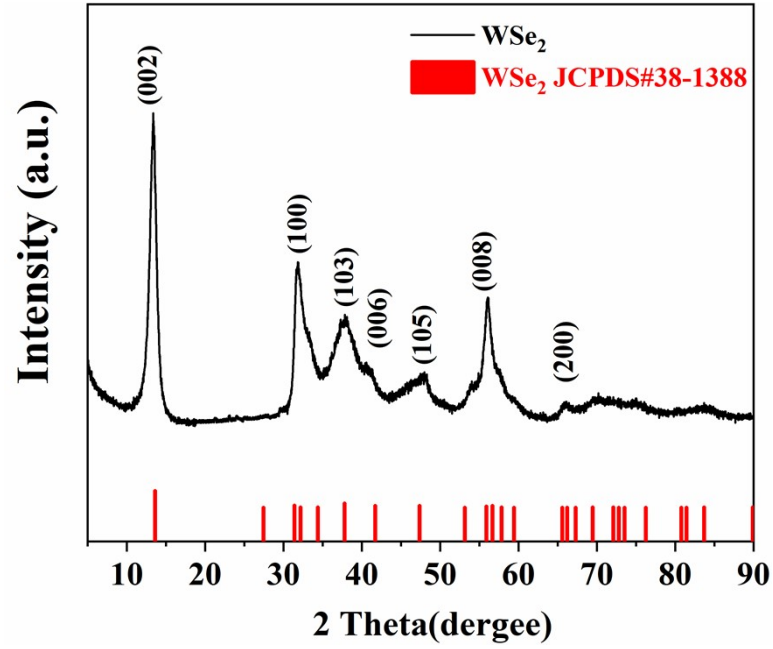

Fig. S1 XRD patterns for  $WSe_2$ .

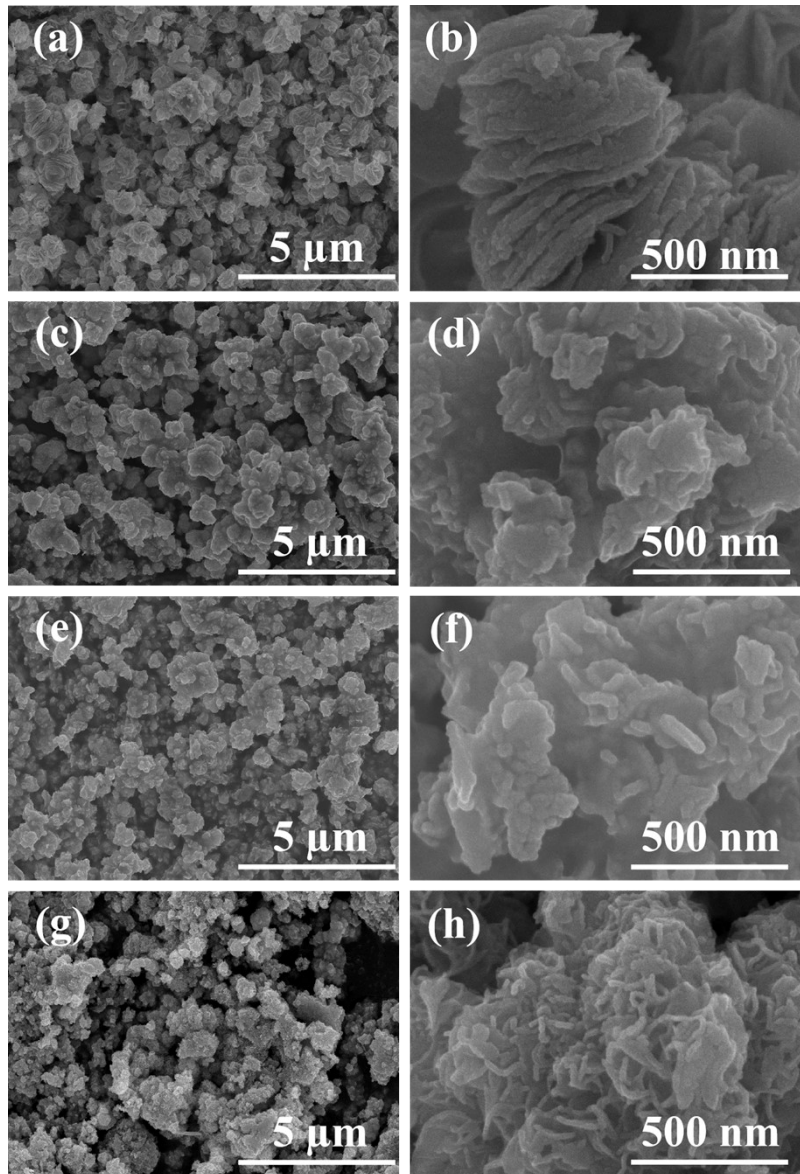

**Fig. S2** The different magnifications SEM images of (a, b) WSe<sub>2</sub>. (c, d) Mo-WSe<sub>2</sub>. (e, f) Ni-WSe<sub>2</sub> and (g, h) NiMo-WSe<sub>2</sub>.

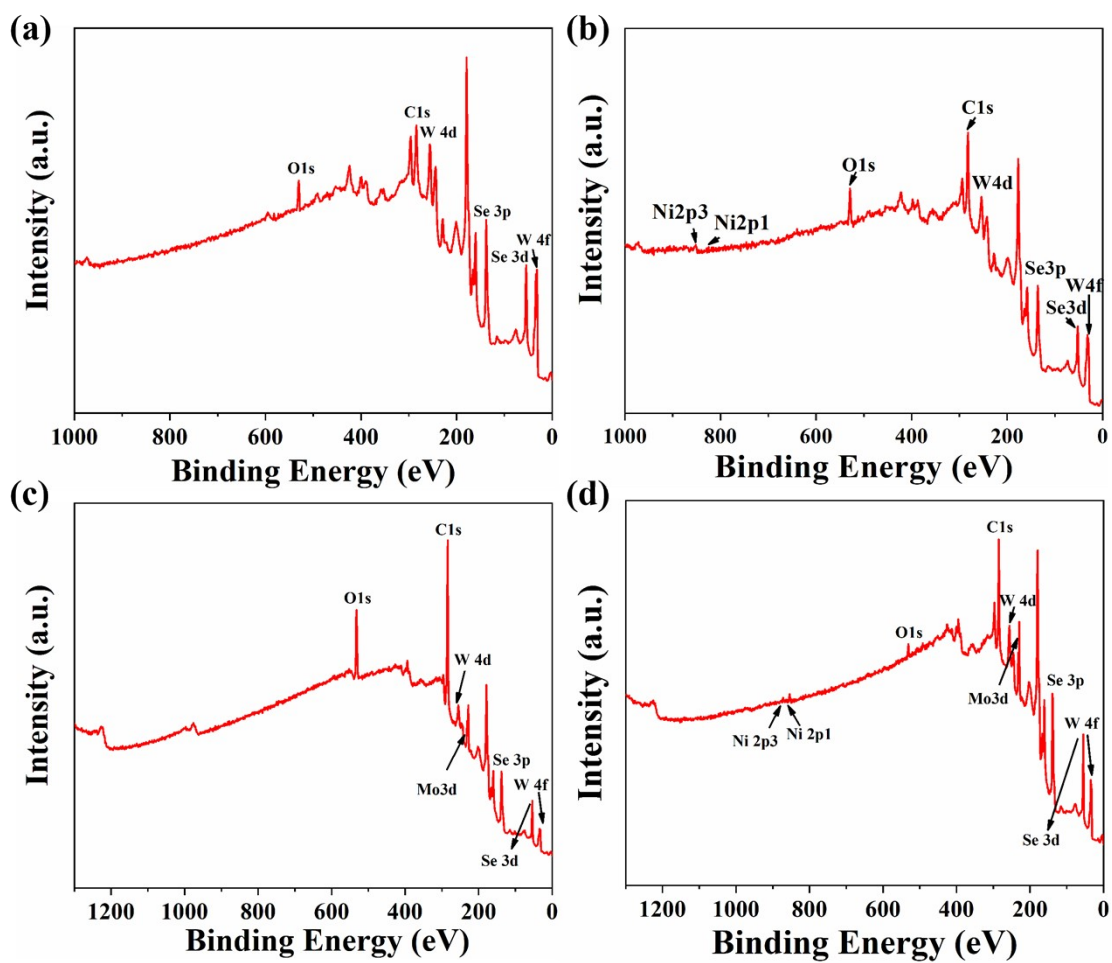

**Fig. S3** XPS survey spectra of (a) WSe<sub>2</sub>. (b) Mo-WSe<sub>2</sub>. (c) Ni-WSe<sub>2</sub> and (d) NiMo-WSe<sub>2</sub>.

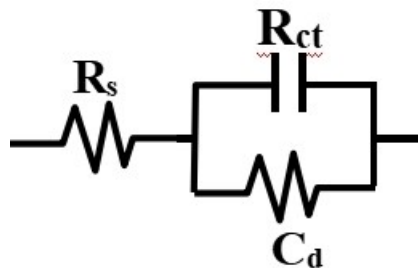

**Fig. S4** Equivalent circuit diagram of electrochemical impedance spectroscopy.

Nyquist plot using ZSimDemo software for data fitting, and using an equivalent circuit with a solution resistance ( $R_s$ ), a charge transfer resistance ( $R_{ct}$ ), and a constant phase element ( $C_d$ ). The corresponding diagram of the equivalent circuit is shown in Fig. S4 and the specific simulation results are summarized in Table S6. As displayed in Fig. 5c and Fig. 5h, all Nyquist plots show the similar trends, suggesting that the charge transfer processes and electrochemical mechanisms of the catalysts toward HER are alike, the  $R_{ct}$  of the catalyst in 0.5 M  $H_2SO_4$  is less than that in 1 M KOH. It can also be observed that these catalysts have different solution resistances ( $R_s$ ) in the 0.5 M  $H_2SO_4$  and 1.0 M KOH electrolyte, which are caused by the different contact resistances between electrode and electrolyte. the NiMo-WSe<sub>2</sub> catalyst exhibits the lowest contact resistance in 0.5 M  $H_2SO_4$  and 1 M KOH.

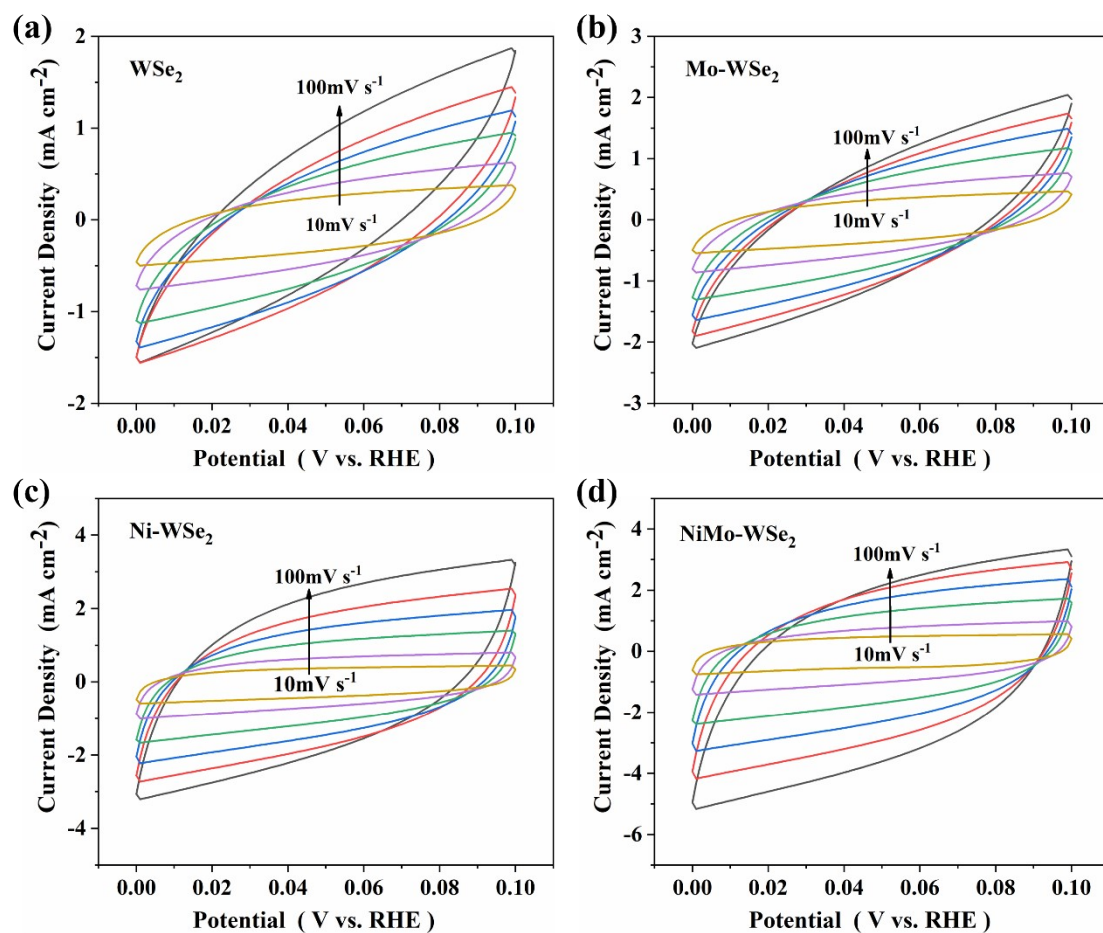

**Fig. S5** CV curves in a non-Faradaic potential range (0-0.1 V vs. RHE) of (a)  $\text{WSe}_2$ , (b)  $\text{Ni-WSe}_2$ , (c)  $\text{Mo-WSe}_2$  and (d)  $\text{NiMo-WSe}_2$ , in  $\text{N}_2$ -saturated 0.5 M  $\text{H}_2\text{SO}_4$  at scan rate of 10  $\text{mV s}^{-1}$ , 20  $\text{mV s}^{-1}$ , 40  $\text{mV s}^{-1}$ , 60  $\text{mV s}^{-1}$ , 80  $\text{mV s}^{-1}$ , 100  $\text{mV s}^{-1}$ .

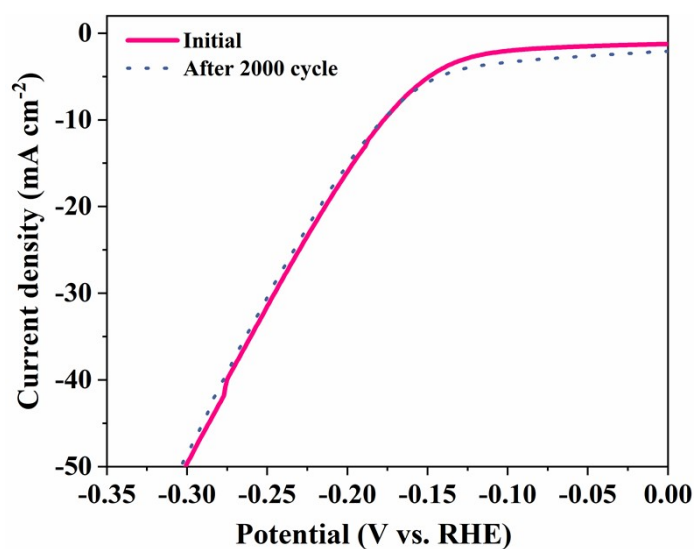

**Fig. S6** Stability test of  $\text{NiMo-WSe}_2$  sample in 0.5 M  $\text{H}_2\text{SO}_4$ . Polarization curves before (red) and after (blue) continuous 2000 CV cycles.

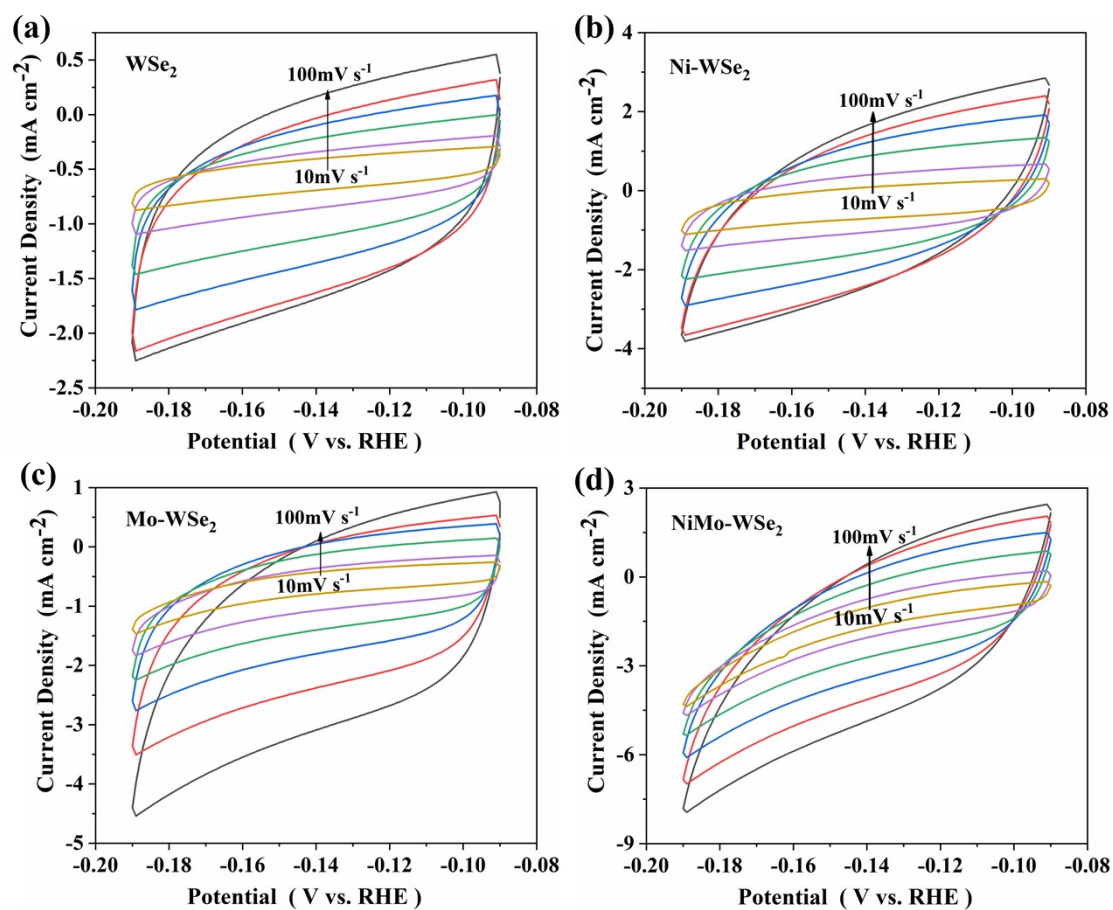

**Fig. S7** CV curves in a non-Faradaic potential range (0-0.1 V vs. RHE) of (a) WSe<sub>2</sub>, (b) Ni-WSe<sub>2</sub>, (c) Mo-WSe<sub>2</sub> and (d) NiMo-WSe<sub>2</sub>, in N<sub>2</sub>-saturated 1 M KOH at scan rate of 10 mV s<sup>-1</sup>, 20 mV s<sup>-1</sup>, 40 mV s<sup>-1</sup>, 60 mV s<sup>-1</sup>, 80 mV s<sup>-1</sup>, 100 mV s<sup>-1</sup>.



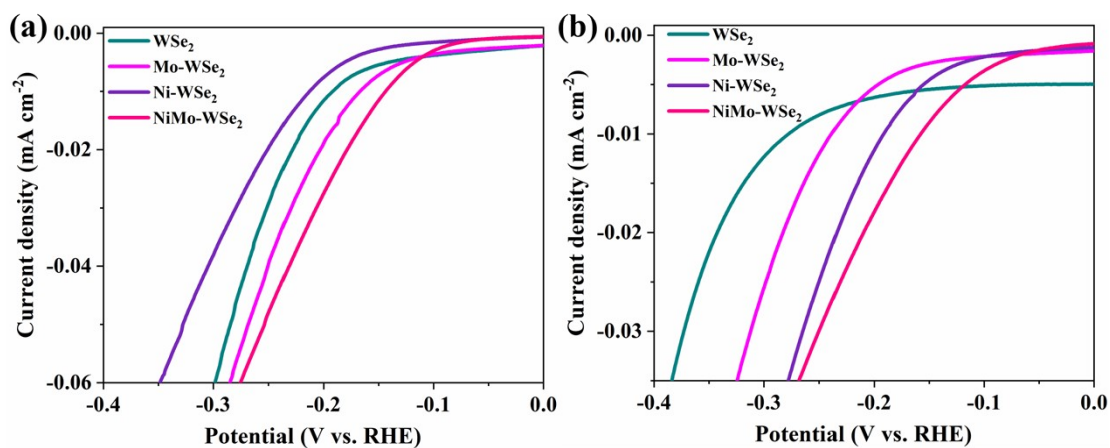

**Fig. S8** Polarization curves with the current densities normalized to ECSA in 0.5 M H<sub>2</sub>SO<sub>4</sub>(a) and 1 M KOH(b) of WSe<sub>2</sub>, Mo-WSe<sub>2</sub>, Ni-WSe<sub>2</sub> and NiMo-WSe<sub>2</sub>.

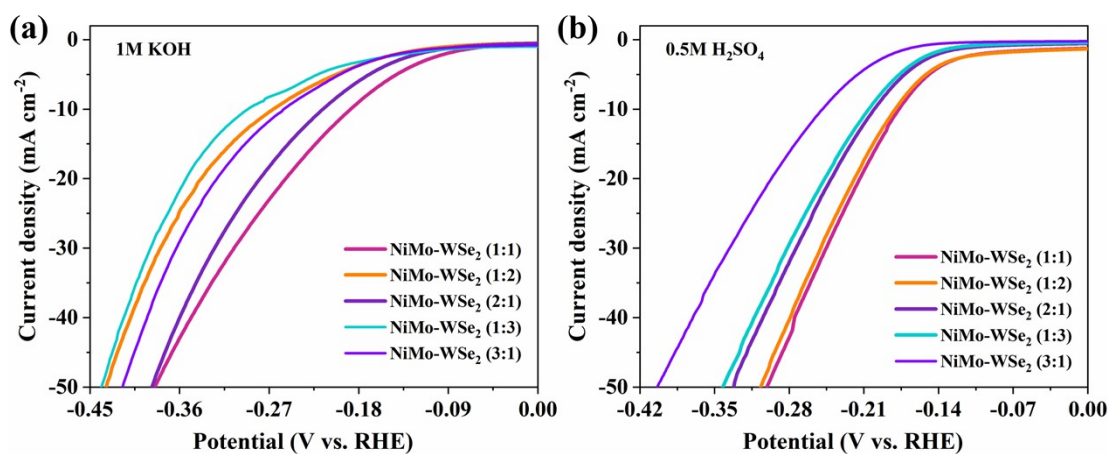

**Fig. S9** Polarization curves of NiMo-WSe<sub>2</sub> in 0.5 M H<sub>2</sub>SO<sub>4</sub>(a) and 1 M KOH(b), where the feed ratio of Ni:Mo is 1:1, 1:2, 2:1, 1:3 and 3:1, respectively.

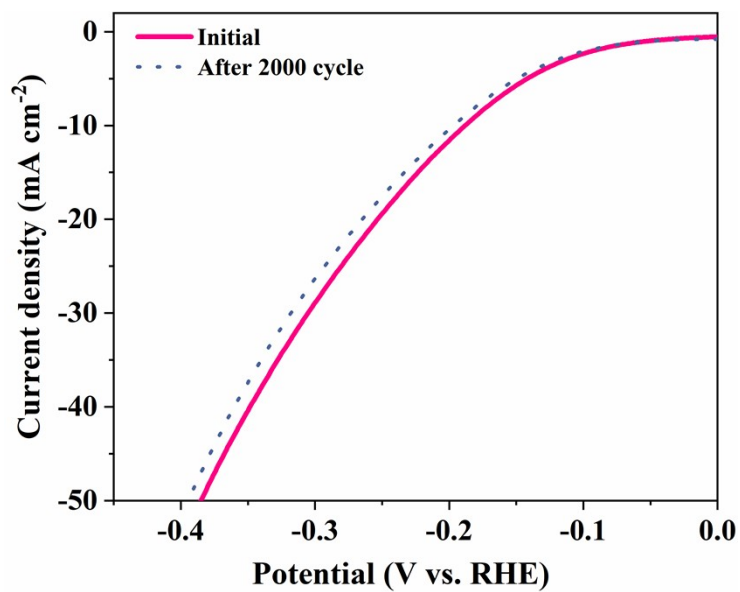

**Fig. S10** Stability test of NiMo-WSe<sub>2</sub> sample in 1 M KOH. Polarization curves before (red) and after (blue) continuous 2000 CV cycles.

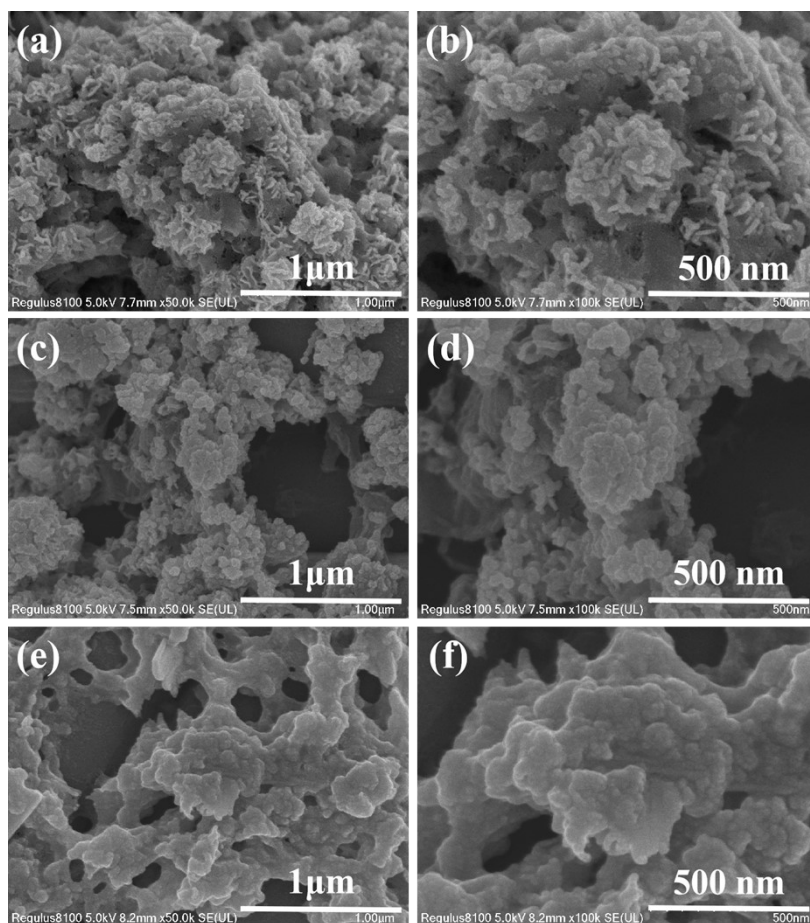

**Fig. S11** The different magnifications SEM images of NiMoWSe<sub>2</sub> before chronoamperometry (a, b), after 40 h of testing in 0.5 M H<sub>2</sub>SO<sub>4</sub> (c, d) and 1 M KOH (e, f).

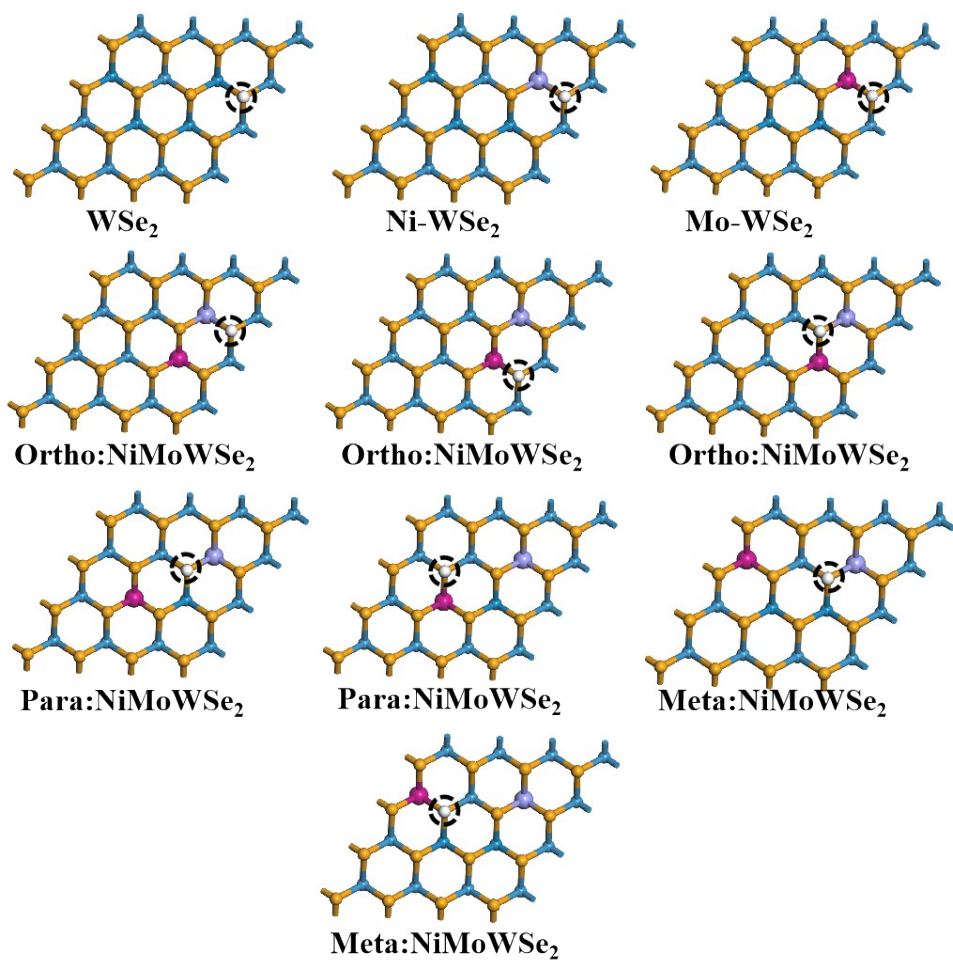

**Fig. S12** The top views of the WSe<sub>2</sub>, Ni-WSe<sub>2</sub>, Mo-WSe<sub>2</sub> and NiMo-WSe<sub>2</sub> model with  $H^*$  adsorbed on the varied local configurations.

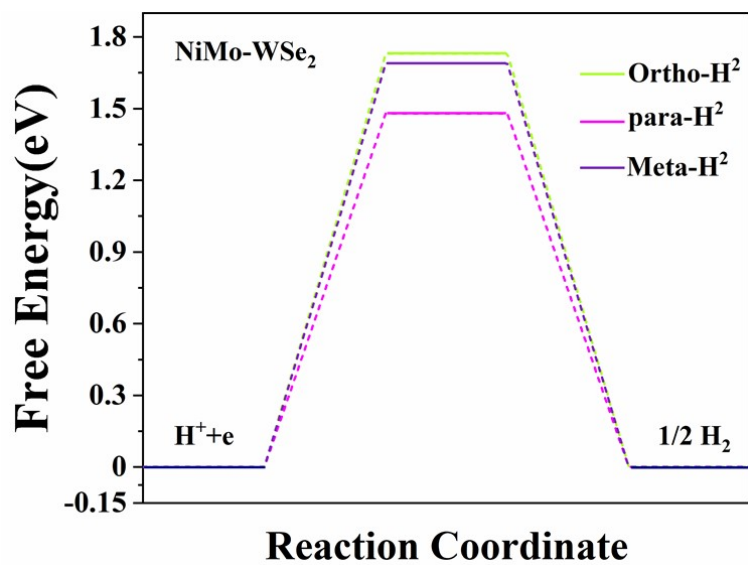

**Fig. S13** In NiMo-WSe<sub>2</sub>, the hydrogen adsorption point is located at the free energy of Se-Mo when Mo is replaced by Ortho, Para and Meta of Ni for W.

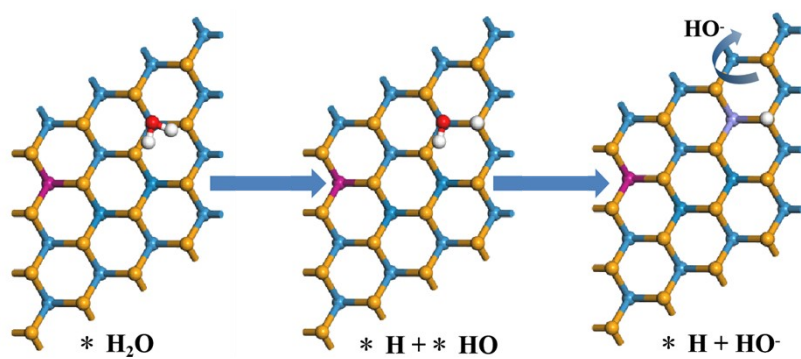

**Fig. S14** DFT-optimized geometries of alkaline HER on NiMo-WSe<sub>2</sub>(Meta).

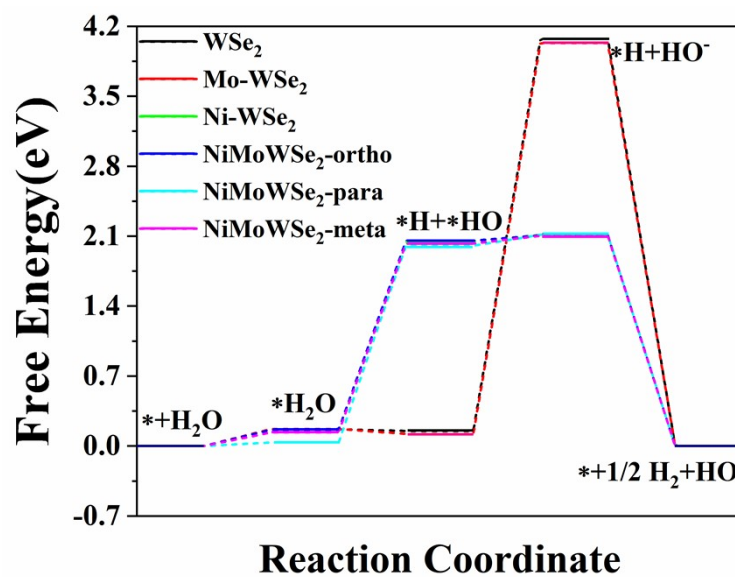

**Fig. S15** Free energy diagrams of the  $\text{WSe}_2$ ,  $\text{Mo-WSe}_2$ ,  $\text{Ni-WSe}_2$  and  $\text{NiMo-WSe}_2$  (ortho, para and meta) under alkaline electrolytes.

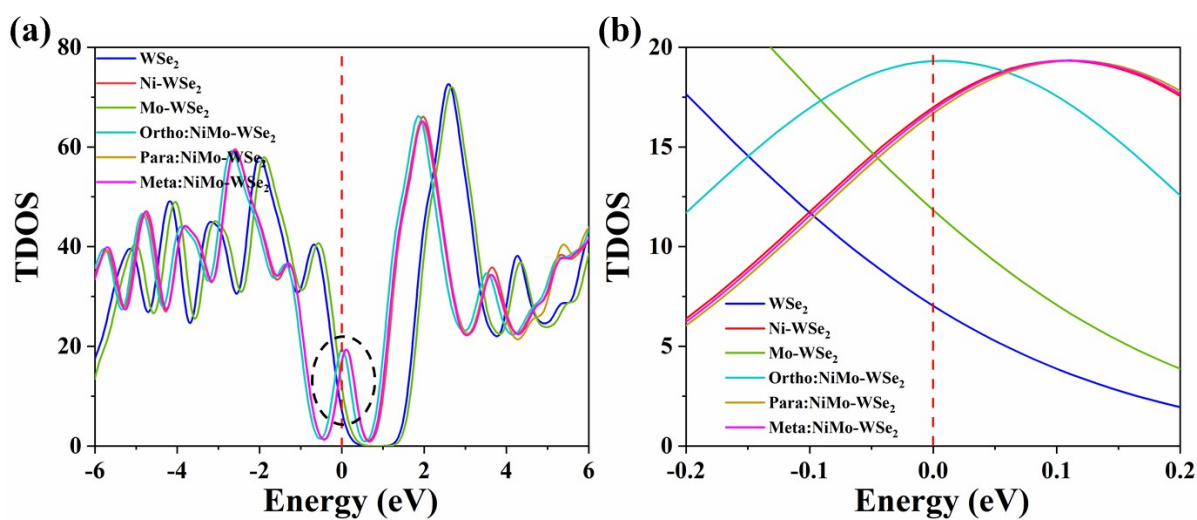

**Fig. S16** (a) Total density of states (TDOS) and (b) Partial enlargement for  $\text{WSe}_2$ ,  $\text{Mo-WSe}_2$ ,  $\text{Ni-WSe}_2$  and  $\text{NiMo-WSe}_2$ .



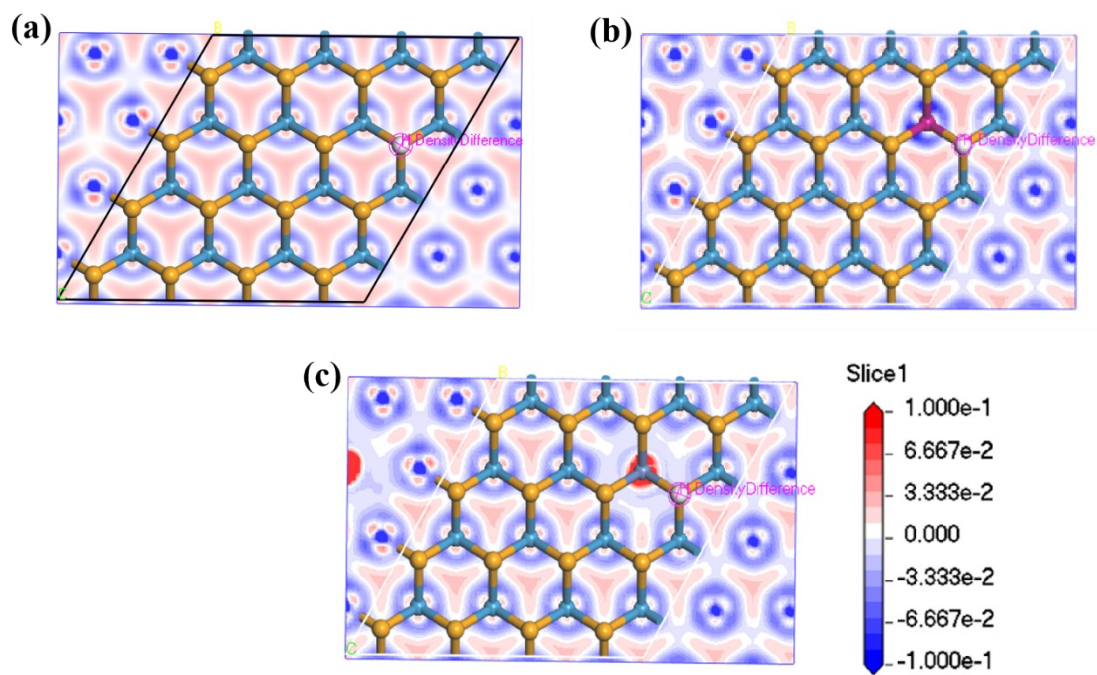

**Fig. S17** Charge density difference plot of (a)WSe<sub>2</sub>. (b)Mo-WSe<sub>2</sub> and (c)Ni-WSe<sub>2</sub>.

**Table S1.** the specific surface area, Pore volume and Pore diameter.

| Sample                | Specific surface area<br>(m <sup>2</sup> g <sup>-1</sup> ) | Pore volume<br>(cm <sup>3</sup> g <sup>-1</sup> ) | Pore diameter<br>(nm) |
|-----------------------|------------------------------------------------------------|---------------------------------------------------|-----------------------|
| WSe <sub>2</sub>      | 10.3013                                                    | 0.061986                                          | 20.9762               |
| Mo-WSe <sub>2</sub>   | 23.7397                                                    | 0.086861                                          | 11.6639               |
| Ni-WSe <sub>2</sub>   | 45.1899                                                    | 0.155643                                          | 10.5731               |
| NiMo-WSe <sub>2</sub> | 47.8663                                                    | 0.230500                                          | 17.3539               |

**Table S2.** Peak area obtained for W, Se, Ni, Co and Mo from X-ray photoelectron spectroscopy.

|    | WSe <sub>2</sub>  | Mo-WSe <sub>2</sub> | Ni-WSe <sub>2</sub> | NiMo-WSe <sub>2</sub> |        |
|----|-------------------|---------------------|---------------------|-----------------------|--------|
| W  | 4f <sub>7/2</sub> | 31.56               | 31.64               | 31.68                 | 32.61  |
|    | 4f <sub>5/2</sub> | 33.71               | 33.79               | 33.84                 | 34.74  |
|    | 4f <sub>7/2</sub> | 35.06               | 35.24               | 35.04                 | 35.96  |
|    | 4f <sub>5/2</sub> | 37.17               | 37.15               | 37.23                 | 38.22  |
| Se | 3d <sub>5/2</sub> | 53.79               | 53.81               | 53.98                 | 54.79  |
|    | 3d <sub>3/2</sub> | 54.63               | 54.64               | 54.80                 | 55.64  |
| Ni | 2p <sub>3/2</sub> |                     |                     | 853.71                | 854.17 |
|    | 2p <sub>1/2</sub> |                     |                     | 871.16                | 871.42 |
| Mo | 3d <sub>5/2</sub> |                     | 228.15              |                       | 229.04 |
|    | 3d <sub>3/2</sub> |                     | 231.23              |                       | 232.15 |

**Table S3.** Contents of WSe<sub>2</sub>, Mo-WSe<sub>2</sub>, Ni-WSe<sub>2</sub> and NiMo-WSe<sub>2</sub> by ICP-AES.

|                             | Ni(at.%) | Mo(at.%) | Se(at.%) | W(at.%) | Atomic ratio of metals<br>(Ni:Mo:Se:W) |
|-----------------------------|----------|----------|----------|---------|----------------------------------------|
| WSe <sub>2</sub>            |          |          | 67.00    | 33.00   | 2.03:1                                 |
| Mo-WSe <sub>2</sub>         |          | 4.67     | 64.02    | 30.31   | 1:13.7:6.49                            |
| Ni-WSe <sub>2</sub>         | 4.96     |          | 65.26    | 29.78   | 1:13.16:6.00                           |
| NiMo-WSe <sub>2</sub> (1:1) | 4.83     | 4.08     | 65.95    | 25.14   | 1:0.84:13.65:5.20                      |



**Table S4.** Electrochemical HER performance of present work along with previous reports.

| Sample                                           | Electrolyte                         | Over Potential(mV),<br>$\eta$ at 10 mA cm <sup>-2</sup> | Tafel slope<br>(mV dec <sup>-1</sup> ) | Ref.      |   |
|--------------------------------------------------|-------------------------------------|---------------------------------------------------------|----------------------------------------|-----------|---|
| NiMo-WSe <sub>2</sub>                            | 0.5M H <sub>2</sub> SO <sub>4</sub> | 177                                                     | 82                                     | This work |   |
| Mo-WSe <sub>2</sub>                              |                                     | 279                                                     | 123                                    |           |   |
| Ni-WSe <sub>2</sub>                              |                                     | 249                                                     | 107                                    |           |   |
| WSe <sub>2</sub>                                 |                                     | 319                                                     | 127                                    |           |   |
| NiMo-WSe <sub>2</sub>                            | 1M KOH                              | 188                                                     | 122                                    |           |   |
| Mo-WSe <sub>2</sub>                              |                                     | 303                                                     | 140                                    |           |   |
| Ni-WSe <sub>2</sub>                              |                                     | 240                                                     | 125                                    |           |   |
| WSe <sub>2</sub>                                 |                                     | 403                                                     | 225                                    |           |   |
| WSe <sub>2</sub>                                 | 0.5M H <sub>2</sub> SO <sub>4</sub> | 307                                                     | 126                                    |           | 4 |
| WSe <sub>2</sub>                                 |                                     | 380                                                     | 105                                    |           |   |
| Ni Doped WSe <sub>2</sub>                        |                                     | 259                                                     | 86                                     |           |   |
| Co Doped WSe <sub>2</sub>                        |                                     | 320                                                     | 93                                     |           |   |
| Fe Doped WSe <sub>2</sub>                        | 0.5M H <sub>2</sub> SO <sub>4</sub> | 285                                                     | 85                                     | 5         |   |
| Zr Doped WSe <sub>2</sub>                        |                                     | 322                                                     | 113                                    |           |   |
| WSe <sub>2</sub> Nanofilms                       | 0.5M H <sub>2</sub> SO <sub>4</sub> | 239                                                     | 184                                    | 6         |   |
| RGO/WSe <sub>2</sub>                             | 0.5M H <sub>2</sub> SO <sub>4</sub> | 220                                                     | 57.6                                   | 7         |   |
| Co/hp-WSe <sub>2</sub>                           | 0.5M H <sub>2</sub> SO <sub>4</sub> | 268                                                     | 37                                     | 8         |   |
| WSe <sub>2</sub>                                 |                                     | 353                                                     | 93                                     |           |   |
| Co-WSe <sub>2</sub>                              | 0.5M H <sub>2</sub> SO <sub>4</sub> | 225                                                     | 48                                     | 9         |   |
| Co-WSe <sub>2</sub> /MWNTs                       |                                     | 174                                                     | 37                                     |           |   |
| WSe <sub>2</sub> -C-20                           | 0.5M H <sub>2</sub> SO <sub>4</sub> | 158                                                     | 98                                     | 10        |   |
| Mo <sub>1-x</sub> W <sub>x</sub> Se <sub>2</sub> | 0.5M H <sub>2</sub> SO <sub>4</sub> | 209                                                     | 76                                     | 11        |   |

**Table S5.** The fitting specific parameters of EIS spectrum.

| Catalyst              | 0.5M H <sub>2</sub> SO <sub>4</sub> |                     | 1M KOH             |                     |
|-----------------------|-------------------------------------|---------------------|--------------------|---------------------|
|                       | R <sub>s</sub> (Ω)                  | R <sub>ct</sub> (Ω) | R <sub>s</sub> (Ω) | R <sub>ct</sub> (Ω) |
| WSe <sub>2</sub>      | 3.301                               | 26.87               | 2.739              | 361.2               |
| Mo-WSe <sub>2</sub>   | 3.607                               | 11.99               | 2.576              | 231.8               |
| Ni-WSe <sub>2</sub>   | 2.695                               | 9.782               | 2.303              | 189.9               |
| NiMo-WSe <sub>2</sub> | 2.394                               | 4.177               | 1.954              | 23.66               |

**Table S6.** TOF value from HER at the overpotential of -0.3V vs RHE for WSe<sub>2</sub>, Mo-WSe<sub>2</sub>, Ni-WSe<sub>2</sub> and NiMo-WSe<sub>2</sub>.

| Sample                | Current density at -0.3V vs RHE (mV) | n (mol)     | TOF      |
|-----------------------|--------------------------------------|-------------|----------|
| WSe <sub>2</sub>      | 7.815                                | 0.022682579 | 0.001785 |
| Mo-WSe <sub>2</sub>   | 12.41                                | 0.022848875 | 0.002814 |
| Ni-WSe <sub>2</sub>   | 19.78                                | 0.022192777 | 0.004618 |
| NiMo-WSe <sub>2</sub> | 49.66                                | 0.023165755 | 0.011108 |

**Table S7.** Formation energies ( $\Delta E$ ) for selected different models of  $WSe_2$ ,  $Ni-WSe_2$ ,  $Mo-WSe_2$  and  $NiMo-WSe_2$  nanostructures and  $\Delta G_{H^*}$  value at different hydrogen adsorption sites.

| Sample              | model                                                                               | Formation energy $\Delta E$ (eV) | Hydrogen adsorption site, $H^*$ at the top of Se | $\Delta G_{H^*}$ (eV) |
|---------------------|-------------------------------------------------------------------------------------|----------------------------------|--------------------------------------------------|-----------------------|
| $WSe_2$             | 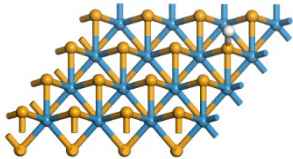   | -1.11(per $WSe_2$ )              | onto Se–W                                        | 2.09                  |
| $Ni-WSe_2$          |    | 3.72                             | onto Se–Ni                                       | -0.08                 |
| $Mo-WSe_2$          |   | -6.33                            | onto Se–Mo                                       | 2.07                  |
| Ortho: $NiMo-WSe_2$ |  |                                  | onto Se–Ni                                       | -0.09                 |
| Ortho: $NiMo-WSe_2$ |  | 3.46                             | onto Ni –Se–Mo                                   | -0.1                  |
| Ortho: $NiMo-WSe_2$ |  |                                  | onto Se–Mo                                       | 1.73                  |
| Para: $NiMo-WSe_2$  |  |                                  | onto Se–Ni                                       | -0.07                 |
|                     |                                                                                     | 3.39                             |                                                  |                       |

|                                 |                                                                                   |                    |       |
|---------------------------------|-----------------------------------------------------------------------------------|--------------------|-------|
| Para: NiMo-<br>WSe <sub>2</sub> | 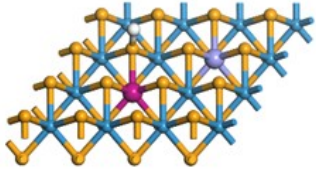 | onto Se–Mo         | 1.48  |
| Meta: NiMo-<br>WSe <sub>2</sub> |  | onto Se–Ni         | -0.04 |
| Meta: NiMo-<br>WSe <sub>2</sub> |  | 3.48<br>onto Se–Mo | 1.69  |

**Table S8. the water dissociation kinetic energy barrier ( $\Delta G_w$ ) of WSe<sub>2</sub>, Mo-WSe<sub>2</sub>, Ni-WSe<sub>2</sub> and NiMo-WSe<sub>2</sub>(ortho, para and meta).**

|                               | $\Delta G_w: *H_2O \rightarrow *H + *HO$ (eV) | $\Delta G_w: *H + *HO \rightarrow *H + HO^-$ (eV) |
|-------------------------------|-----------------------------------------------|---------------------------------------------------|
| WSe <sub>2</sub>              | -0.015                                        | 3.925                                             |
| Mo-WSe <sub>2</sub>           | -0.051                                        | 3.914                                             |
| Ni-WSe <sub>2</sub>           | 1.887                                         | 0.062                                             |
| NiMo-WSe <sub>2</sub> (Ortho) | 1.891                                         | 0.056                                             |
| NiMo-WSe <sub>2</sub> (Para)  | 1.968                                         | 0.109                                             |
| NiMo-WSe <sub>2</sub> (Meta)  | 1.890                                         | 0.077                                             |

## Reference

- 1 M. Zheng, Q. Chen and Q. Zhong, *Dalton Transactions*, 2021, **50**, 13320-13328.
- 2 D. R. Paudel, U. N. Pan, T. I. Singh, C. C. Gudal, N. H. Kim and J. H. Lee, *Applied Catalysis B-Environmental*, 2021, **286**, 119897.
- 3 J. Wang, W. Fang, Y. Hu, Y. Zhang, J. Dang, Y. Wu, B. Chen, H. Zhao and Z. Li, *Applied Catalysis B-Environmental*, 2021, **298**, 120490.
- 4 S. H. Jo, D. H. Kang, J. Shim, J. Jeon, M. H. Jeon, G. Yoo, J. Kim, J. Lee, G. Y. Yeom, S. Lee, H.-Y. Yu, C. Choi and J.-H. Park, *Advanced Materials*, 2016, **28**, 4824-4831.

- 5 S. R. Kadam, A. N. Enyashin, L. Houben, R. Bar Ziv and M. Bar Sadan, *Journal of Materials Chemistry A*, 2020, **8**, 1403-1416.
- 6 H. Li, J. Zou, S. Xie, X. Leng, D. Gao, H. Yang and X. Mao, *Journal of Alloys and Compounds*, 2017, **725**, 884-890.
- 7 X. Wang, Y. Chen, B. Zheng, F. Qi, J. He, P. Li and W. Zhang, *Electrochimica Acta*, 2016, **222**, 1293-1299.
- 8 Z. Sun, Y. Wang, J. Lang, M. Yang, F. Jin and Y. H. Hu, *Journal of Materials Chemistry A*, 2021, **9**, 13490-13495.
- 9 G. Zhang, X. Zheng, Q. Xu, J. Zhang, W. Liu and J. Chen, *Journal of Materials Chemistry A*, 2018, **6**, 4793-4800.
- 10 M. Zou, J. Chen, L. Xiao, H. Zhu, T. Yang, M. Zhang and M. Du, *Journal of Materials Chemistry A*, 2015, **3**, 18090-18097.
- 11 O. E. Meiron, V. Kuraganti, I. Hod, R. Bar Ziv and M. Bar Sadan, *Nanoscale*, 2017, **9**, 13998-14005.
